# Supplementary material for: Reliable Detection of Paternal SNPs within Deletion Breakpoints for Non-Invasive Prenatal Exclusion of Homozygous α0-Thalassemia in Maternal Plasma
Source: PubMed Central journal article supplement (PMC3182989; doi:10.1371/journal.pone.0024779), 2011-09-29
Supplement: pone.0024779.s002.pdf [file pone.0024779.s002.pdf]

**A**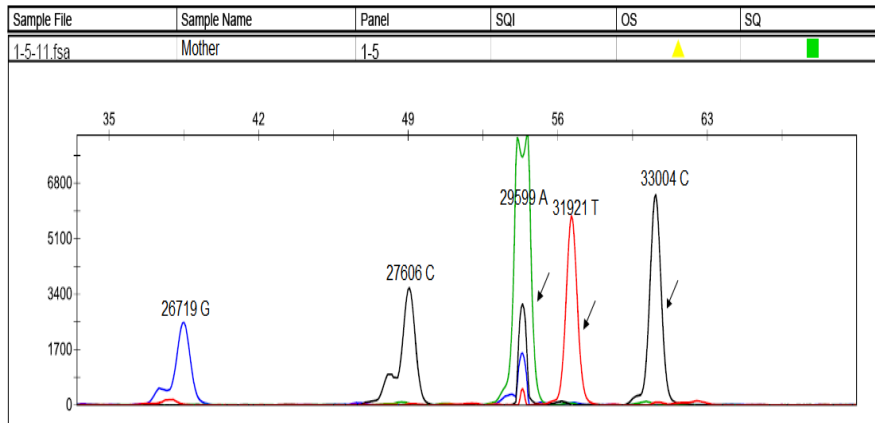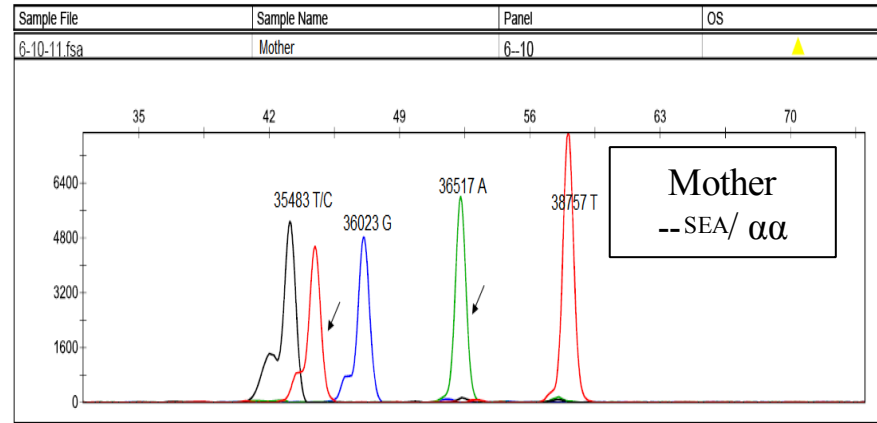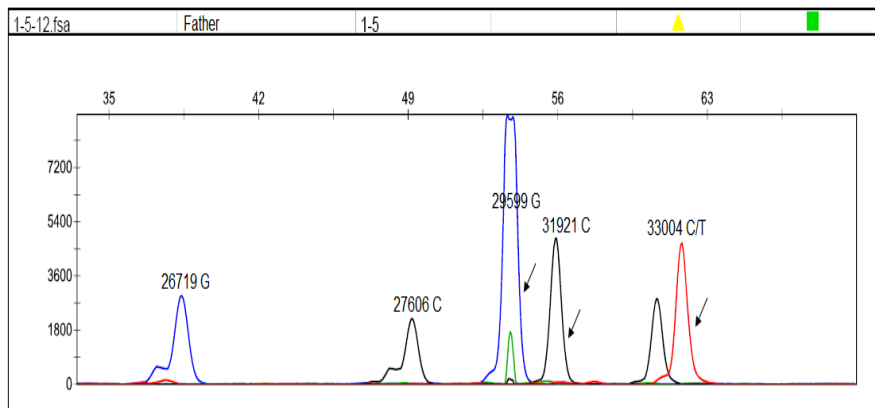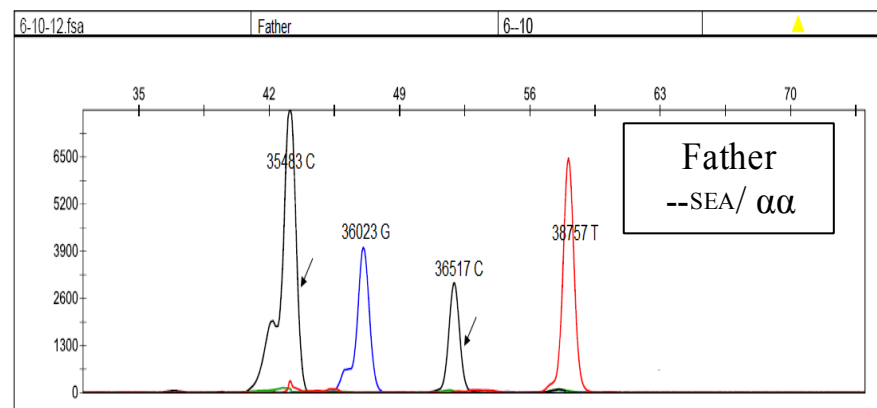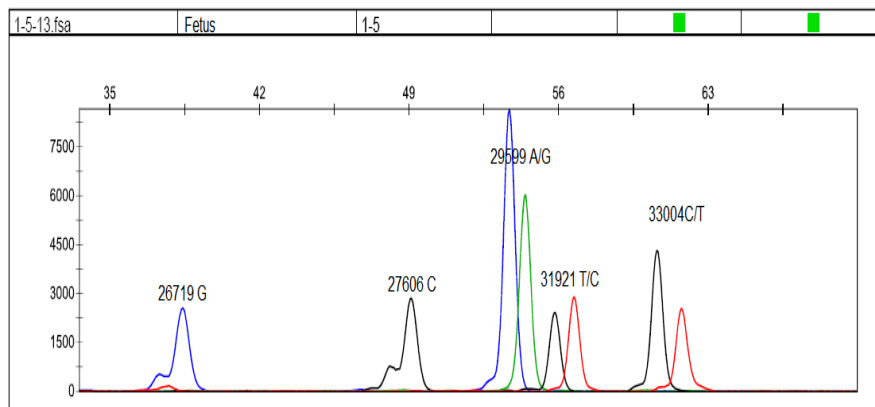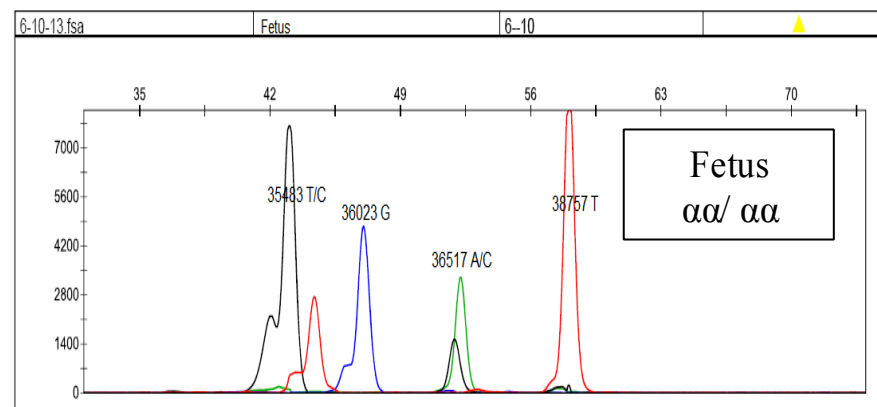

**B**

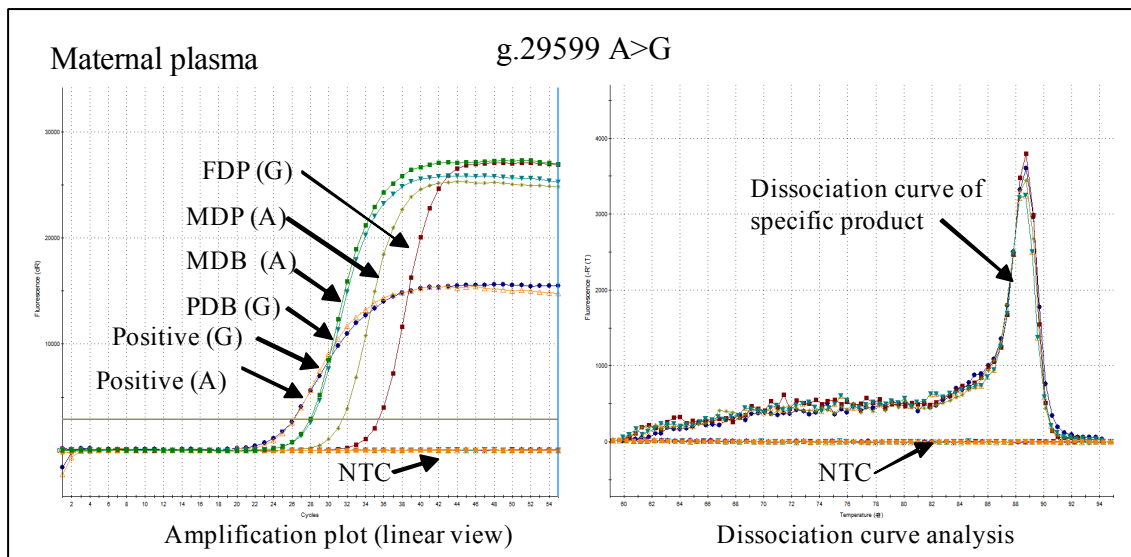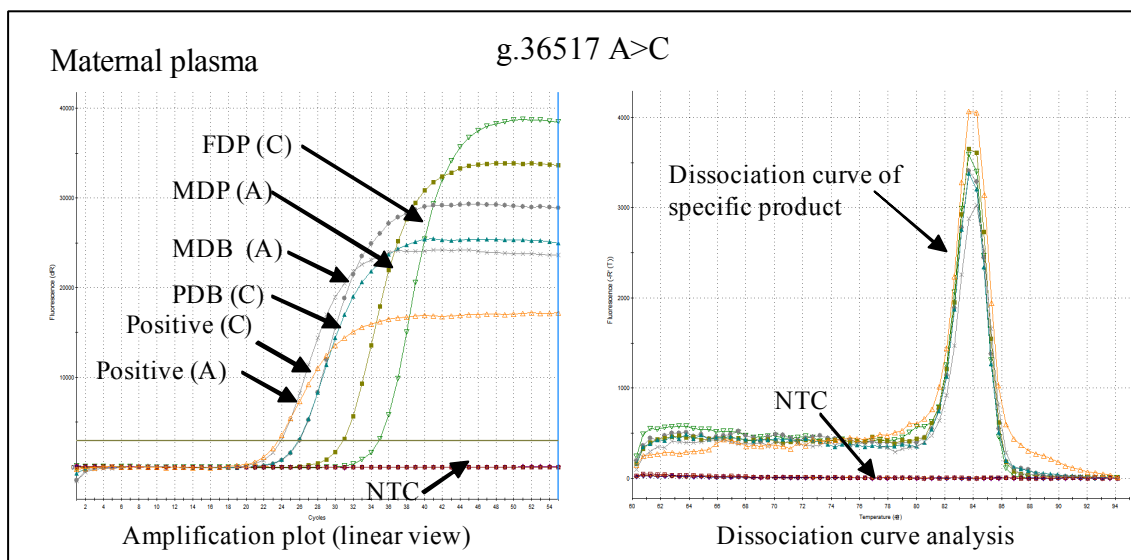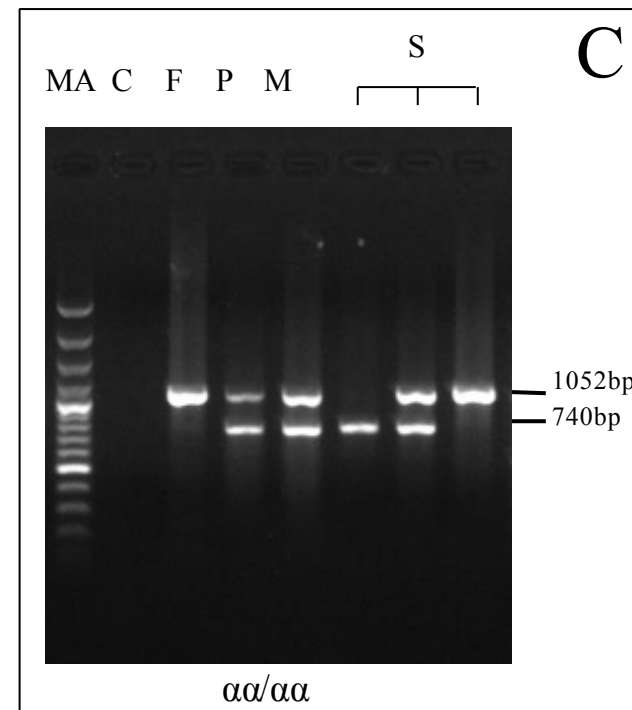

|             | $C_{T,Maternal}$ | $C_{T,Paternal}$ | $\Delta C_{T,(P-M)}$ |
|-------------|------------------|------------------|----------------------|
| g.29599 A>G | 31.52            | 35.41            | 3.89                 |
| g.36517 A>C | 30.96            | 34.86            | 3.90                 |

Family 7

A

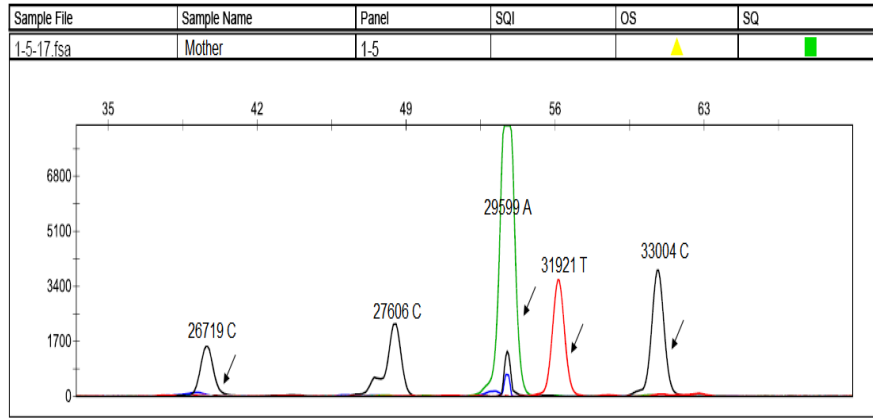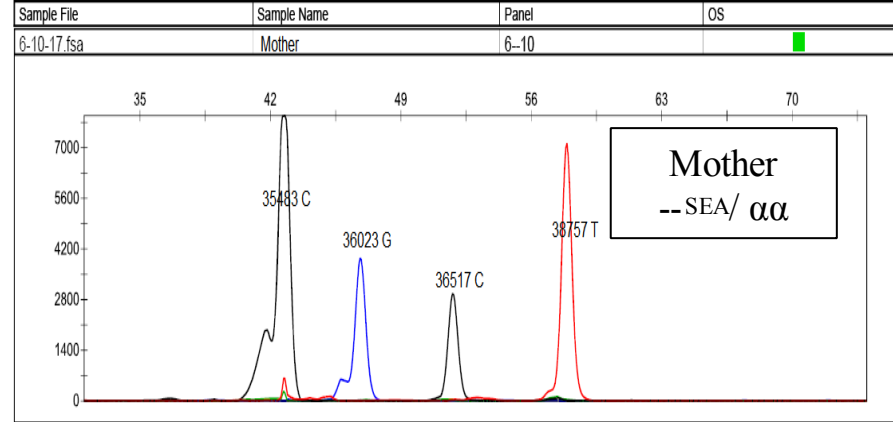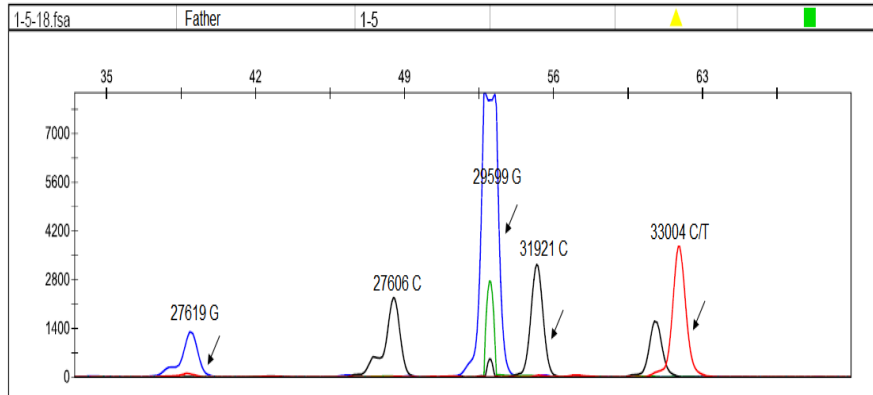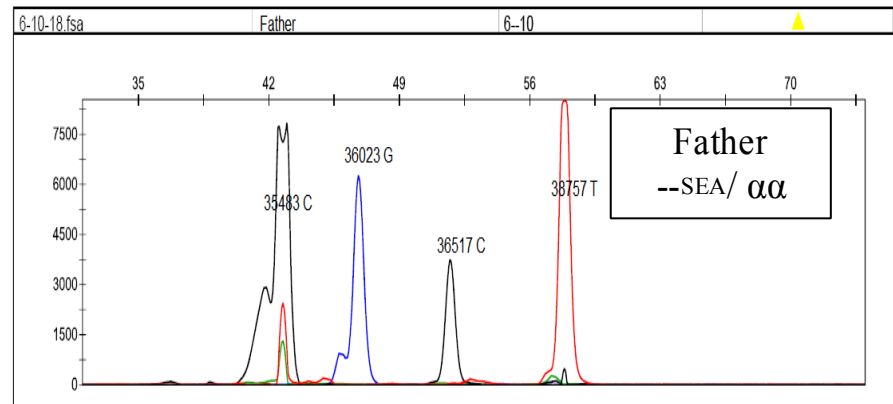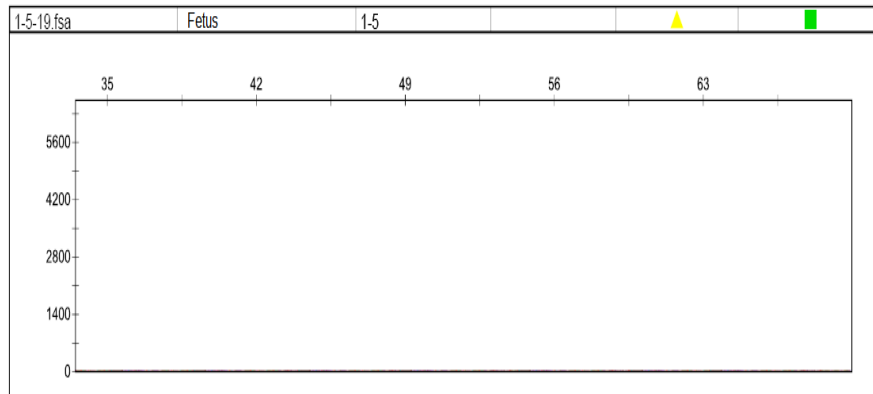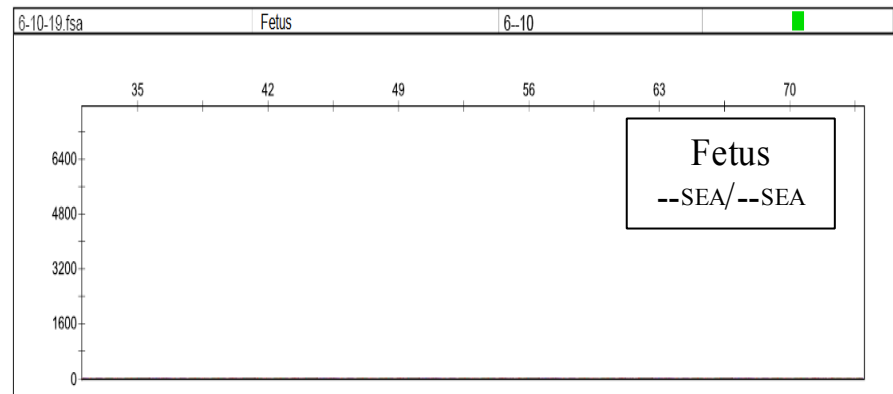

**B**

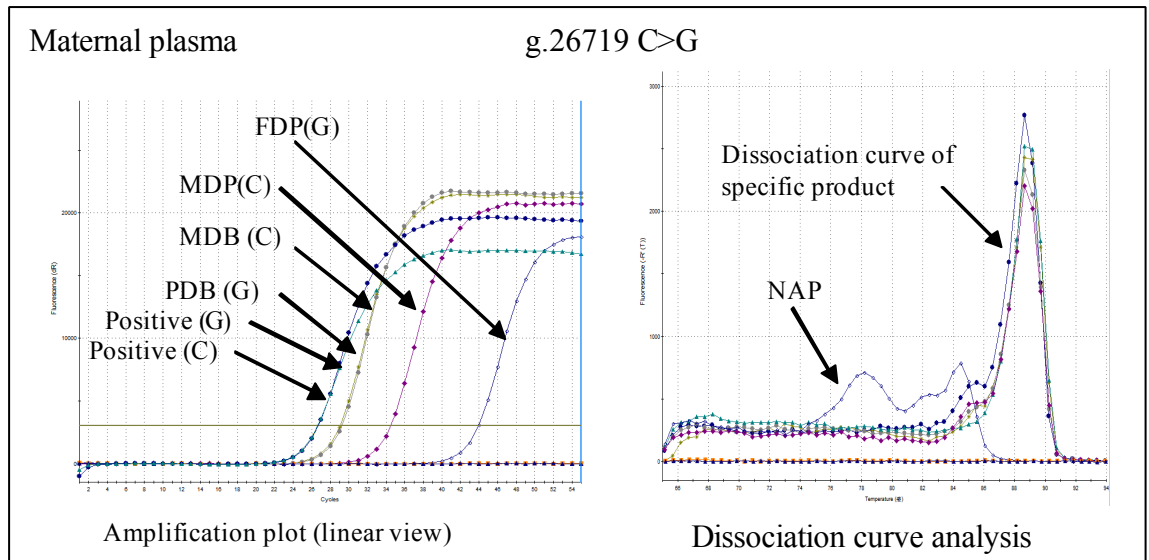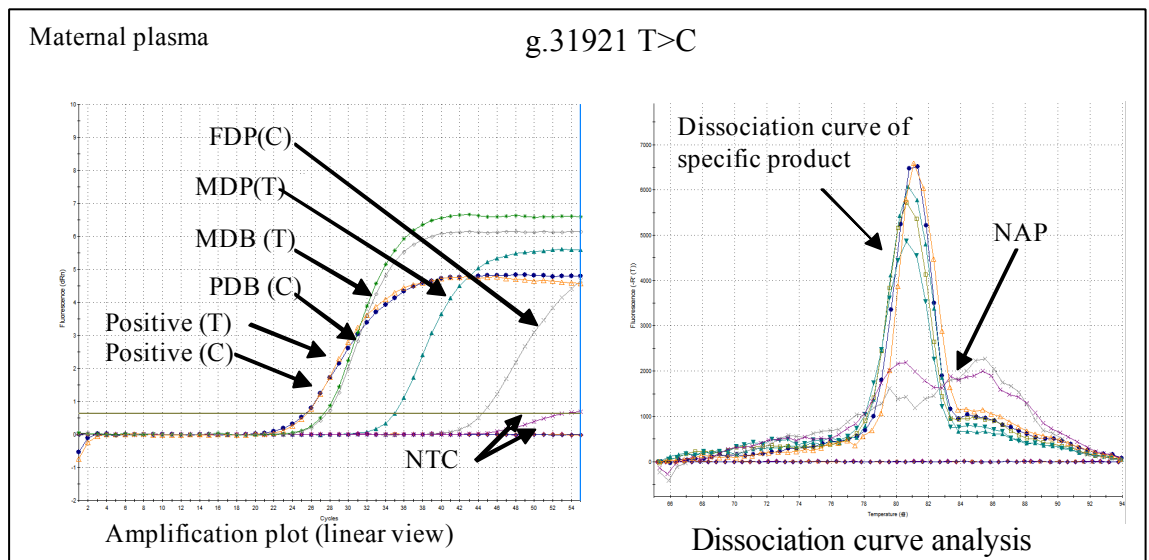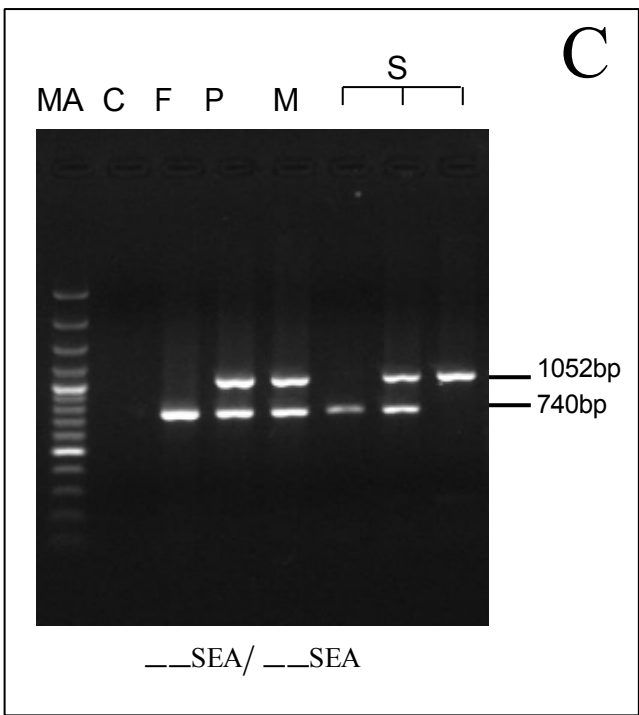

|             | $C_{T,Maternal}$ | $C_{T,Paternal}$ | $\Delta C_{T,(P-M)}$ |
|-------------|------------------|------------------|----------------------|
| g.26719 C>G | 34.53            | 43.97            | 9.44                 |
| g.31921 T>C | 34.94            | 44.41            | 9.47                 |

## Family 47

Figure S2. Representative NIPD for  $\alpha$ -thalassemia in two families performed using our protocol
